# Supplementary material for: A strategy for preparing controllable, superhydrophobic, strongly sticky surfaces using SiO2@PVDF raspberry core–shell particles
Source: Royal Society of Chemistry journal article supplement (doi:10.1039/d1ra03928h), 2021-01-01
Supplement: d1ra03928h1.pdf [file d1ra03928h1.pdf]

## Supporting Information

# **A strategy for preparing controllable, superhydrophobic, strongly sticky surfaces using SiO<sub>2</sub>@PVDF raspberry core–shell particles**

*Seung-Hyun Kim<sup>a</sup>, Hong Suk Kang<sup>a</sup>, Eun-Ho Sohn<sup>a</sup>, Bong-Jun Chang<sup>a</sup>, In Jun Park<sup>a</sup>, and  
Sang Goo Lee<sup>\*a</sup>*

*<sup>a</sup>Interface Materials and Chemical Engineering Research Center, Korea Research Institute of  
Chemical Technology, Daejeon 34114, Republic of Korea*

\* E-mail: [sgoo@kriict.re.kr](mailto:sgoo@kriict.re.kr)

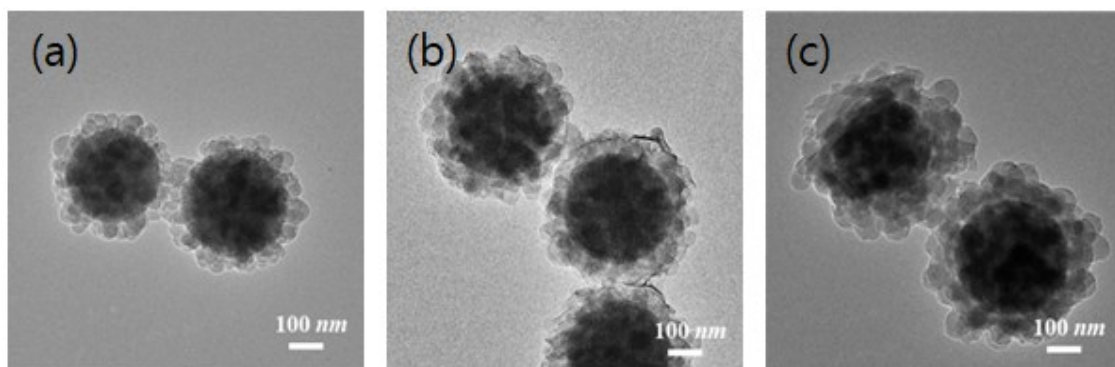

**Figure S1.** TEM images of SPRCSPs prepared using VDF gas: (a) 10 g, (b) 15 g, and (c) 18 g.

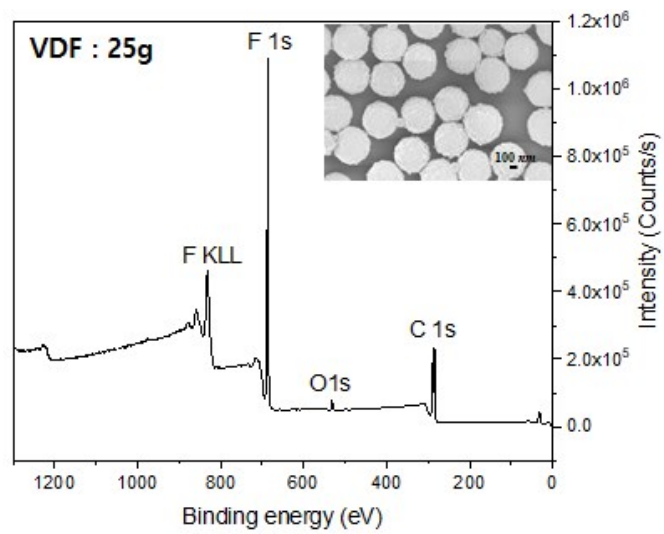

**Figure S2.** XPS spectra and SEM image (insert) of SPRCSPs prepared using 25 g VDF gas.

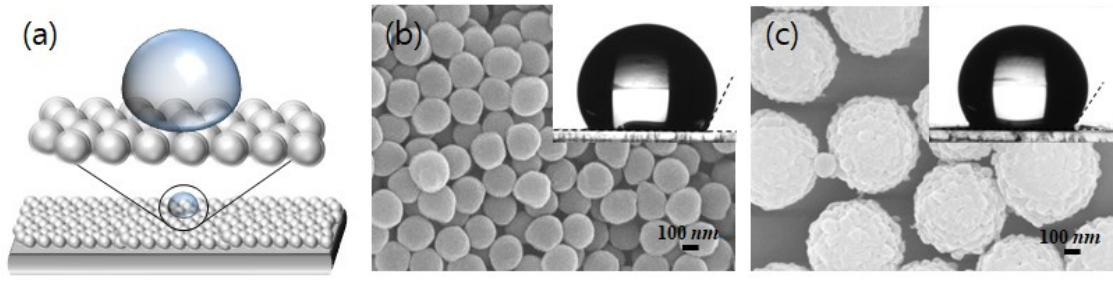

**Figure S3.** (a) Schematic of a water droplet on the ordered structure composed of SPRCSPs. SEM image and optical image (insert) of (b) PVDF particles and (c) SPRCSPs (VDF 25 g).

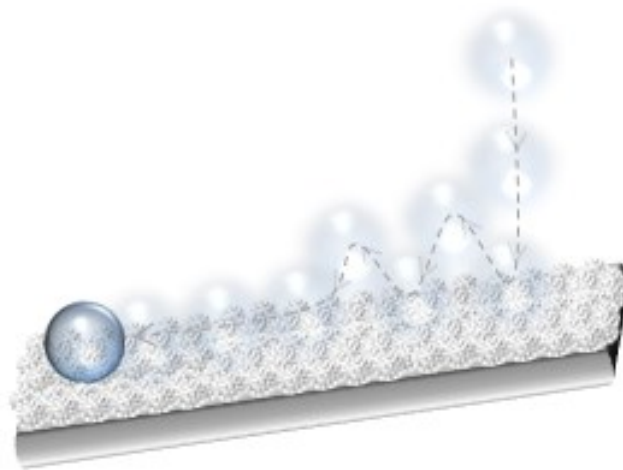

**Figure S4.** Schematic of a moving water droplet on an ordered structure composed of SPRCSP.
